# Supplementary material for: Exploring the Formation of Polymers with Anti-Amyloid Properties within the 2′3′-Dihydroxyflavone Autoxidation Process
Source: Antioxidants (Basel). 2022 Aug 30;11(9):1711. doi: 10.3390/antiox11091711 (PMC9495709; doi:10.3390/antiox11091711)
Supplement: Supplementary file 1 [file antioxidants-11-01711-s001.zip › antioxidants-1853563-supplementary.pdf]

# Exploring the Formation of Polymers with Anti-Amyloid Properties within the 2'3'-Dihydroxyflavone Autoxidation Process

Andrius Sakalauskas, Agne Janoniene, Gediminas Zvinys, Kamile Mikalauskaite, Mantas Ziaunys and Vytautas Smirnovas \*

Institute of Biotechnology, Life Sciences Center, Vilnius University, Vilnius, Lithuania

To whom correspondence should be addressed:

Vytautas Smirnovas

Vytautas@smirnovas.info

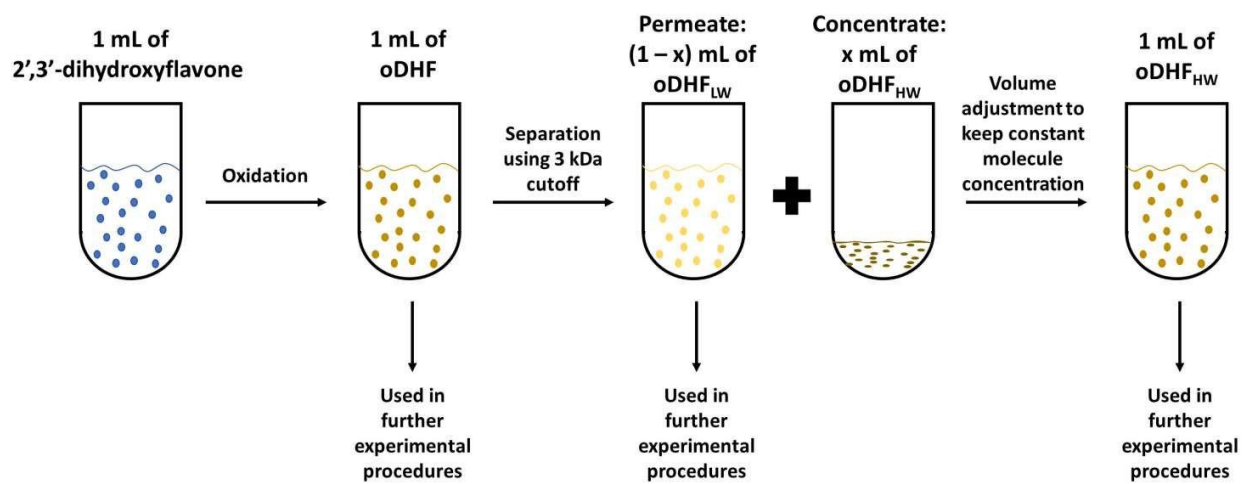

**Figure S1.** Oxidation of 2',3'-dihydroxyflavone and the separation procedure of the oxidation mixture.

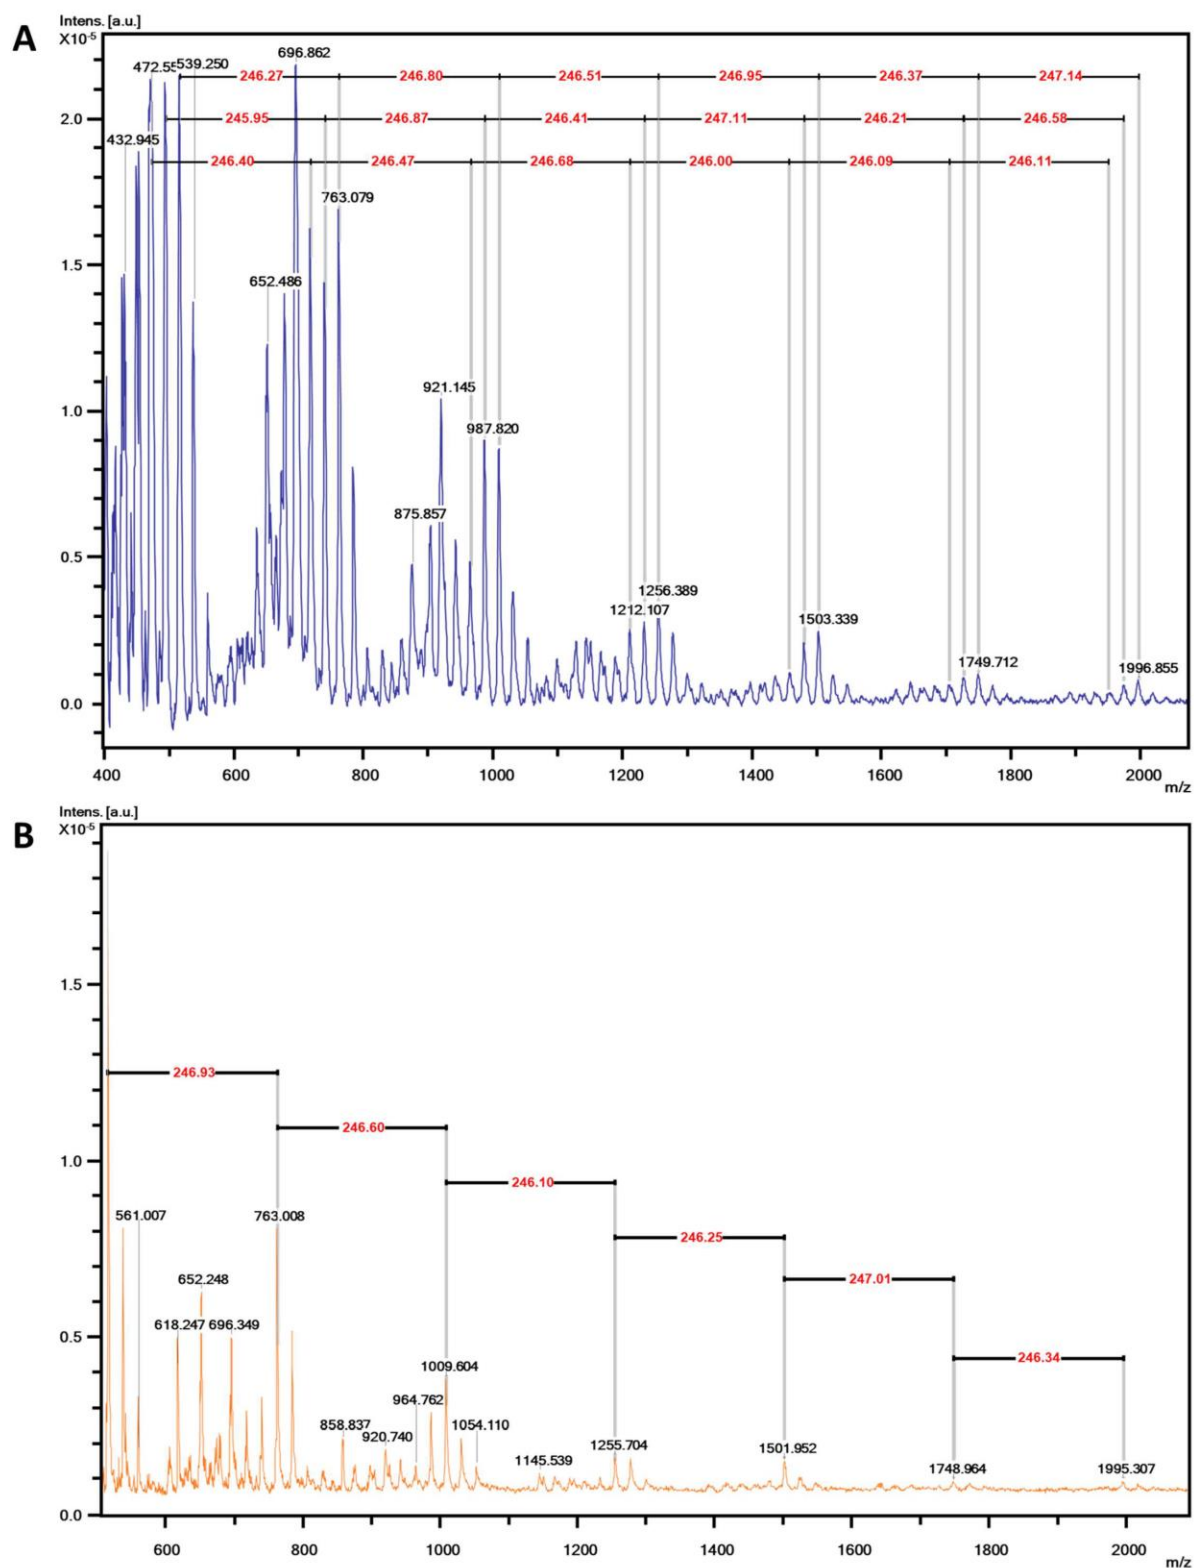

**Figure S2.** MALDI-TOF spectrum of oDHF<sub>HW</sub> prepared using SA (A) and 2,5-DHB (B) as a MALDI matrix material.

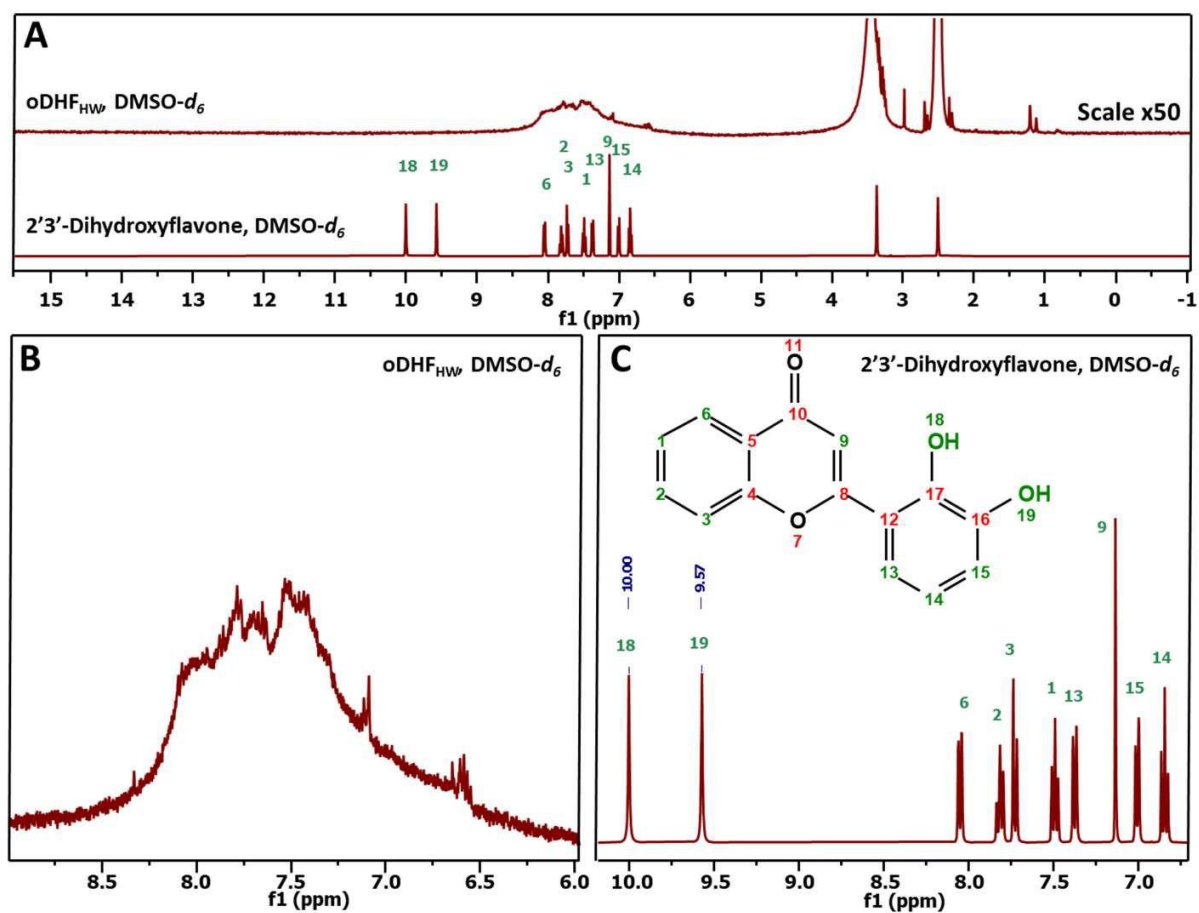

**Figure S3.** The  $^1\text{H}$  NMR spectra of oDHF<sub>HW</sub> and 2'3'-dihydroxyflavone recorded in DMSO-*d*<sub>6</sub> (A). Aromatic region (9.0 - 6.0 ppm) of oDHF<sub>HW</sub> (B) and the zoomed spectra (10.5 – 6.5 ppm) of 2'3'-dihydroxyflavone aromatic and hydroxyl groups region.

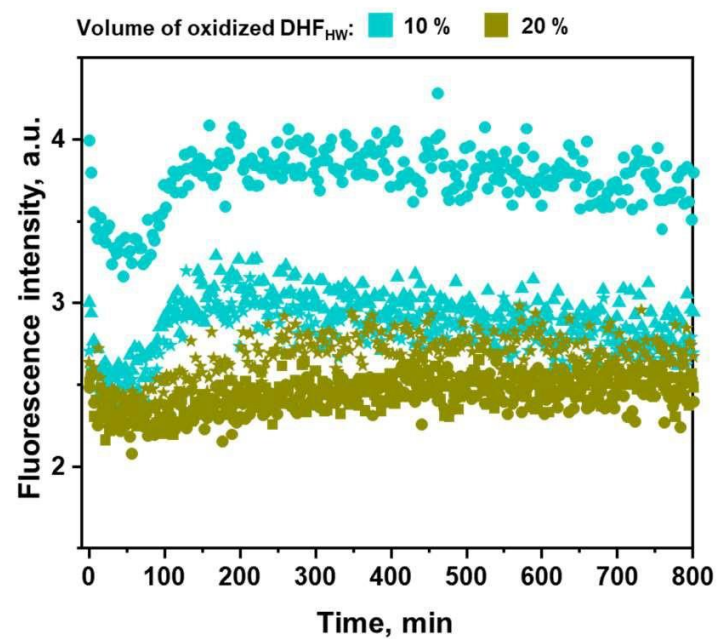

**Figure S4.** The kinetic curves of 1  $\mu$ M A $\beta$  aggregation with 10 % and 20 % of oDHF<sub>HW</sub>.

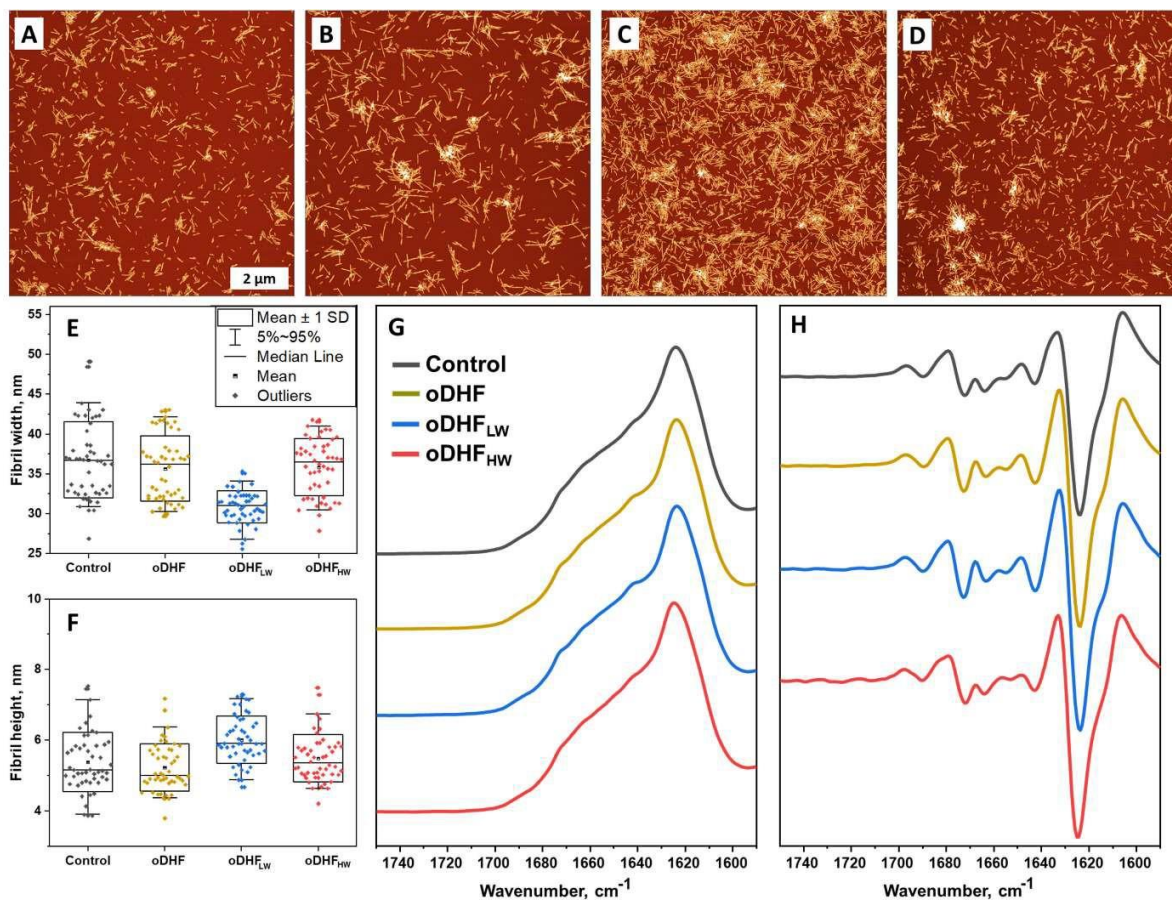

**Figure S5.** Atomic force microscopy (AFM) images of aSyn without (A) and with oDHF (B), oDHF<sub>LW</sub> (C) and oDHF<sub>HW</sub> (D). The fibril height (E) and width (F) distribution, where box plots indicate mean  $\pm$  SD and error bars are in the 5% - 95% range ( $n = 50$ ). The FTIR spectra of aSyn fibrils formed with or without inhibitors (G) and their second derivatives (H).
